# Supplementary material for: Analyzing the performance of vertical wind profilers in rain events
Source: Copernicus journal article supplement (doi:10.5194/wes-2024-132), 2024-11-07
Supplement: Supplementary file [file wes-2024-132-AC1-supplement.pdf]

Ref.: Article WES-2024-132 "Analyzing the performance of vertical wind profilers in rain events."

Author(s): Adriel J. Carvalho et al.

MS type: Research article."

Dear Editor,

We have attached the answers to the reviewer's comments regarding Adriel J. Carvalho et al.'s paper "Analyzing the performance of vertical wind profilers in rain events." The answers are in red, and the modifications are indicated in red in the manuscript.

Best wishes,

Denisson Q. Oliveira

Federal University of Maranhão, Brazil

## ANSWERS TO REVIEWER 1

The authors appreciate the reviewers' valuable comments. We hope that the answers match all the concerns raised about the manuscript. All modifications are indicated below.

1. Table 1: Please, consider the possibility of appending a geographic representation of the measurement points to the table itself.

The authors have included a new figure (Figure 1) in the manuscript. The other figures have been re-numbered according to the modifications.

2. Section 2.3: Instead of using subsections, it could be useful to describe all criteria using a bulleted list.

The authors analyzed the suggestion but did not follow it because section 2.3 already has many bullets in subsections. Changing the structure using a bulleted list may not help to improve the manuscript.

3. Figure 1: when commenting on Figure 1, is it possible to spend a few words to explain the fact that  $R_{max}$  may be greater or lower than RA? This was just mentioned in section 2.3, but here a clarification could help readers understand the employed criteria.

As requested, the authors have included additional comments regarding  $R_{max}$  and RA in Section 3.1. The following text has been included: "R<sub>max</sub> and RA tend to have similar values, but as explained in Section 2.3, while R<sub>max</sub> represents the longest range the equipment could estimate the wind speed, RA shows the loss ratio, which could happen at intermediate heights, without affecting the maximum range." Figure 2 caption has also been improved.

4. Figure 2 (and many others): In the caption, it is written "Source: Author". What does it mean?

The phrase "Source: Author" has been inserted into captions, meaning the figure is created by the authors (not from other references). The term "Source: Author" has been removed from all figures to avoid misunderstanding.

5. Figure 3: This figure is hard to interpret:

- a. The legend can be improved. I guess the different lines refer to different levels of C10.
- b. Y-label can be ameliorated.

The authors agree with the reviewer that the figure did not help the reader understand the subject. To improve the manuscript and to describe the results from Figure 3, it has been changed by Table 4, which brings the same information differently. A new explanation was provided in the text referencing Table 4, which deals with the same subject.

6. General comments on section 3.1:

- a. The values of Standard deviations in Tables 2 and 3 deserve explanations. They are mildly commented on but may bear important information.

Section 3.1 includes additional text discussing the behavior of the standard deviation of CON10 and C10, with their averages. Tables 2 and 3 have been updated according to the reviewer's suggestion.

Below is the text included in the article:

"Analyzing the values of the means and standard deviations of CON10 and C10, respectively, in Tables 2 and 3, it can be seen that the variation in range (RA) increases as the intensity and constancy of precipitation increase. This trend is seen in the rise in the percentage values of the standard deviation, with the mean of each RA, as the values of CON10 and C10 increase."

- b.

There is some kind of mixed relationship between CON10 and C10... What happens for high C10 but low CON10 and vice versa? Maybe a double-entry table or a 3D plot may help readers understand the characteristics of RA combining these two criteria.

To address the reviewer's question, the different rainfall intensities (C10) were compared with the consistency of rainfall (CON10). The drop in RA was found to be more related to CON10 than C10 since, with high CON10; the RA reduction occurs for all C10 levels. As CON10 decreases, there is a smaller reduction in RA, although higher C10 values have some influence on RA for CON10 values lower than 10. A table showing RA values (mean, standard deviation, and coefficient of variation) with various C10 intensities and the maximum CON10 value was added and discussed.

Table 4 – Average, Standard Deviation, and Coefficient of Variation of RA with C10 and CON10 = 10 min

| C10                      | 0 to 2.8 | 2.9 to 5.6 | 5.7 to 8.4 | 8.5 to 11.2 | 11.3 to 14 |
|--------------------------|----------|------------|------------|-------------|------------|
| Number of events         | 27       | 32         | 30         | 16          | 6          |
| Average RA               | 0.056    | 0.058      | 0.050      | 0           | 0.017      |
| Standard Deviation       | 0.199    | 0.121      | 0.192      | 0           | 0.041      |
| Coefficient of Variation | 358%     | 210%       | 384%       | 0%          | 245%       |

7. Figure 4 and related comments: It is hard to extract some pieces of information from this analysis because the wind at different altitudes is typically different due to the atmospheric shear layer. Additionally, different shear layers can be experienced in the same location according to the stability of the atmosphere. I strongly suggest either eliminating the plots (and the few lines of comments) from the text, or extending thoroughly the analysis as, in the current state, the plots does not offer a valuable output given the scope of the paper.

The following text has been added to the manuscript in Section 3.1 to explain Figure 4 to match the reviewer's concerns.

"The representativeness of SODAR measurements during precipitation events was assessed to determine whether the observations were consistent or affected by precipitation. Additional considerations were necessary to ensure the consistency of SODAR

measurements during precipitation. Ideally, an anemometer should be installed near the SODAR at a comparable height within its vertical profile. Since this setup was not feasible, the following approach was adopted: (1) the SODAR was installed in a flat area free of obstacles; (2) a correlation was assumed between the SODAR's lowest range (30 m) and a sonic anemometer at 10 m on a nearby micrometeorological tower; and (3) similar correlations under precipitation and non-precipitation conditions were used as evidence that precipitation did not degrade SODAR data quality.

This analysis involved comparing the wind speed measured by the highest anemometer (10 m) on a micrometeorological mast with the wind speed observed by the SODAR at its lowest range (30 m). The analysis considered days with and without precipitation events. Table 5 presents the number of events analyzed, while Figure 4 illustrates the distribution of these events along with the Pearson correlation. As expected, due to the height difference, the SODAR values at 30 m were higher than those recorded by the anemometer at 10 m. Without precipitation (Figure 4a), the correlation was  $R=0.93$ , indicating highly representative measurements. During precipitation events (Figure 4b), the correlation decreased slightly to  $R=0.83$ , suggesting increased variability and reduced reliability. The Bias analysis revealed values of 0.65 for events without precipitation and 0.06 for events with precipitation, reflecting the expected difference in average wind speeds between 10 m and 30 m, mainly with high speed, that happens more frequently during good weather conditions. These findings support the conclusion that, while precipitation introduces some variability, SODAR measurements remain reliable and representative under such conditions.”

8. Figure 7: same observation as the previous point.

The following text has been added to the manuscript in Section 3.2.1 to explain Figure 7 to match the reviewer's concerns.

“The representativeness of LIDAR measurements during precipitation events was assessed to determine whether the observations were consistent or affected by precipitation. Additional considerations were necessary to ensure the consistency of LIDAR measurements during precipitation. Ideally, an anemometer should be installed near the LIDAR at a comparable height within its vertical profile. Since this setup was not feasible, the following approach was adopted: (1) the LIDAR was installed in a flat area free of obstacles; (2) a correlation was assumed between the LIDAR's lowest range (40 m) and a sonic anemometer at 10 m on a nearby micrometeorological tower; and (3) similar correlations under precipitation and non-precipitation conditions were used as evidence that precipitation did not degrade LIDAR data quality.

This analysis involved comparing the wind speed measured by the highest anemometer (10 m) on a micrometeorological mast with the wind speed observed by the LIDAR at its lowest range (40 m). The analysis considered days with and without precipitation events. Table 8 presents the number of events analyzed, while Figure 7 illustrates the distribution of these events along with the Pearson correlation.

Due to the height difference, the LIDAR values at 40 m were higher than those recorded by the anemometer at 10 m, as expected. The distribution for these events, together with the Pearson correlation of 0.96, shows no decrease in the correlation between events with and without precipitation, as shown in Figure 7.

The Bias analysis revealed values of 1.80 for events without precipitation and 1.48 for events with precipitation, reflecting the expected difference in average wind speeds between 10 m and 40 m. These findings support the conclusion that LIDAR measurements remain reliable and representative under such conditions.”

9. Figure 8: missing x-label. Y-label can be improved.

Labels have been included for the "X" axis of the graph in Figure 8.

10. Pag.17, lines 254-255: As it was previously written, Here the overspeed is due to the shear layer. Since we might experience shear layers of different magnitudes, the difference between measurements taken at 10m and 40m cannot be compared directly. Hence, fig 10 and the related comments hardly provide useful information. Please, clarify.

The following text has been added to the manuscript in Section 3.2.2 to explain Figure 10 to match the reviewer's concerns.

“The representativeness of LIDAR measurements during precipitation events was assessed to determine whether the observations were consistent or affected by precipitation. Additional considerations were necessary. Ideally, an anemometer should be installed near the LIDAR at a comparable height within its vertical profile. Since this setup was not feasible, the following approach was adopted: (1) the LIDAR was installed in a flat area free of obstacles; (2) a correlation was assumed between the LIDAR's lowest range (40 m) and a sonic anemometer at 10 m on a nearby micrometeorological tower; and (3) similar correlations under precipitation and non-precipitation conditions were used as evidence that precipitation did not degrade LIDAR data quality.

This analysis involved comparing the wind speed measured by the highest anemometer (10 m) on a micrometeorological mast with the wind speed observed by the LIDAR at its lowest range (40 m). The analysis considered days with and without precipitation events. Table 16 presents the number of events analyzed, while Figure 10 illustrates the distribution of these events along with the Pearson correlation.

Analysis of the distribution of these events, with Pearson's correlation, revealed no significant change in the correlation between events with (0.93) and without precipitation (0.90), as illustrated in Figure 10.

The analysis revealed Bias values of 1.65 for events without precipitation and 1.31 for events with precipitation, reflecting the expected difference in average wind speeds between 10 m and 40 m. These findings support the conclusion that LIDAR measurements remain reliable and representative under such conditions.”

11. Line 258: “suggesting that inland winds have a significant impact on the equipment's range”, this needs a justification, otherwise it could be viewed as a spurious correlation. Could it be dependent on wind events, that may occur more often in the case of inland winds?

Given the reviewer's considerations that the correlation of RA drop may not be directly correlated with the wind coming from the continent, an analysis was performed with a point close to the coast (P3). The point where the most intense rainy period occurred in the entire experiment (9.78 mm/day) was chosen. The rainy period results in a decrease in the

influence of the trade winds and the intensity of the sea breeze. These two conditions lead to weaker winds and longer periods in directions coming from the continent. This means that point P3 has less influence from maritime aerosols, similar to points far from the coast. Eighteen rain events were found when analyzing this point, ten of which had RA drops. Of these, seven had speeds below 5 m/s, three had speeds between 7 and 5 m/s, seven had direction coming from the sea, and three had direction coming from the land. There were also eight precipitation events without RA drops. In all of them, the wind direction came from the sea, and the speed was above 5 m/s. This analysis reinforces the understanding that low-intensity wind or wind from the continent delays the return of aerosols responsible for recovering RA performance.
